# Supplementary material for: Association of DNA Methylation Patterns in 7 Novel Genes With Ischemic Stroke in the Northern Chinese Population
Source: Frontiers journal article supplement (doi:10.3389/fgene.2022.844141), 2022-04-11
Supplement: Data_Sheet_3.PDF [file Data_Sheet_3.PDF]

### Additional file 3

#### 10 CpG sites in 850K BeadChip and replication stage.

| Target                           | Gene Name      | Group difference | <i>P</i> value    | Methylation type in IS |
|----------------------------------|----------------|------------------|-------------------|------------------------|
| 850K array                       |                |                  |                   |                        |
| cg08931687                       | <i>PCDHB16</i> | -0.1711          | <i>P</i> =0.0307* | Hypomethylated         |
| cg09150559                       | <i>PCDHB10</i> | -0.2068          | <i>P</i> =0.0390* | Hypomethylated         |
| cg09319843                       | <i>CDH2</i>    | -0.1519          | <i>P</i> =0.0438* | Hypomethylated         |
| cg13464915                       | <i>CDH2</i>    | -0.1600          | <i>P</i> =0.0357* | Hypomethylated         |
| cg18417245                       | <i>PCDHB11</i> | -0.1026          | <i>P</i> =0.0451* | Hypomethylated         |
| cg16049600                       | <i>PCDHB11</i> | -0.1999          | <i>P</i> =0.0182* | Hypomethylated         |
| cg21522026                       | <i>PCDHB14</i> | -0.1275          | <i>P</i> =0.0059* | Hypomethylated         |
| cg22879458                       | <i>PCDHB9</i>  | -0.1314          | <i>P</i> =0.0344* | Hypomethylated         |
| cg24586758                       | <i>PCDHB3</i>  | -0.1300          | <i>P</i> =0.0186* | Hypomethylated         |
| cg26866168                       | <i>PCDHB6</i>  | -0.1397          | <i>P</i> =0.0470* | Hypomethylated         |
| Replication in 20 paired samples |                |                  |                   |                        |
| cg08931687                       | <i>PCDHB16</i> | -0.0970          | <i>P</i> =0.0280* | Hypomethylated         |
| cg09150559                       | <i>PCDHB10</i> | -0.1121          | <i>P</i> =0.0042* | Hypomethylated         |
| cg09319843                       | <i>CDH2</i>    | -0.0183          | <i>P</i> =0.1222  | Hypomethylated         |
| cg13464915                       | <i>CDH2</i>    | -0.0244          | <i>P</i> =0.0374* | Hypomethylated         |
| cg18417245                       | <i>PCDHB11</i> | -0.0687          | <i>P</i> =0.0683  | Hypomethylated         |
| cg16049600                       | <i>PCDHB11</i> | -0.1226          | <i>P</i> =0.0175* | Hypomethylated         |
| cg21522026                       | <i>PCDHB14</i> | -0.0257          | <i>P</i> =0.1509  | Hypomethylated         |
| cg22879458                       | <i>PCDHB9</i>  | -0.1043          | <i>P</i> =0.0035* | Hypomethylated         |
| cg24586758                       | <i>PCDHB3</i>  | -0.0499          | <i>P</i> =0.0570  | Hypomethylated         |
| cg26866168                       | <i>PCDHB6</i>  | -0.0556          | <i>P</i> =0.0636  | Hypomethylated         |

AS the sample size is small and the samples are matched, we did not correct for confounding factors.

\*Statistically significant difference ( $P < 0.05$ ). *CpG* cytosine phosphate guanine; *IS* ischemic stroke
